# Supplementary material for: Network Analysis of Publicly Available RNA-seq Provides Insights into the Molecular Mechanisms of Plant Defense against Multiple Fungal Pathogens in Arabidopsis thaliana
Source: MDPI journal article supplement (doi:10.3390/genes14122223), 2023-12-16
Supplement: s1 [file s1]

**Network analysis of publicly available RNA-seq data provides insights into the molecular mechanisms of plant defense against multiple fungal pathogens in *Arabidopsis thaliana***

Cynthia Soto-Cardinault<sup>1</sup>, Kevin L. Childs<sup>2</sup>, Elsa Góngora-Castillo<sup>3,\*</sup>

<sup>1</sup> Unidad de Biotecnología. Centro de Investigación Científica de Yucatán. Mérida, Yucatán 97205. México; cyntsc10@gmail.com

<sup>2</sup> Plant Biology Department. Michigan State University, East Lansing, MI 48824. USA; kchilds@msu.edu

<sup>3</sup> CONAHCYT-Unidad de Biotecnología. Centro de Investigación Científica de Yucatán. Mérida, Yucatán 97205. México

\*Correspondence: elsa.gongora@cicy.mx

## Supplemental Material

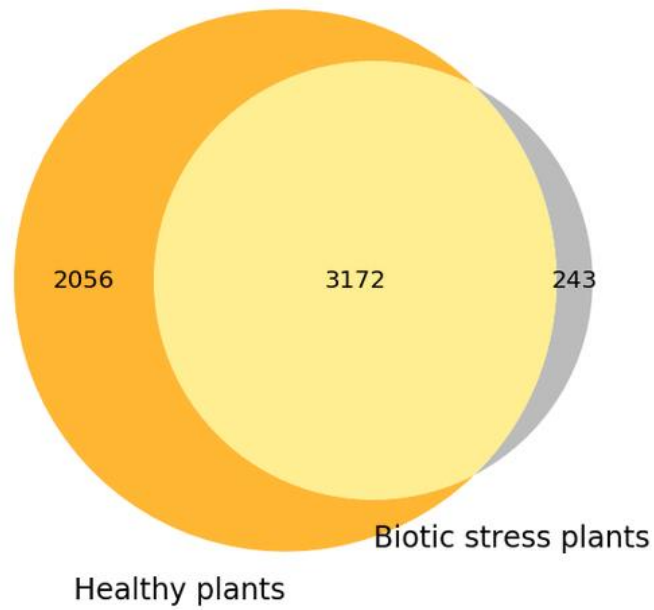

**Figure S1. Venn diagrams for non-expressed genes.** Expression values equal to zero were removed from both control sample and stress-treated sample datasets.

**(A)****(B)**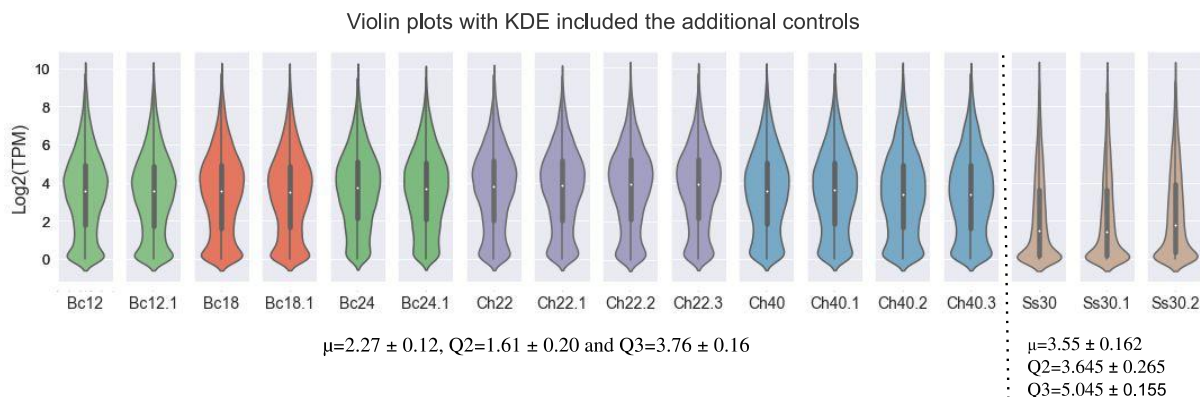**(C)**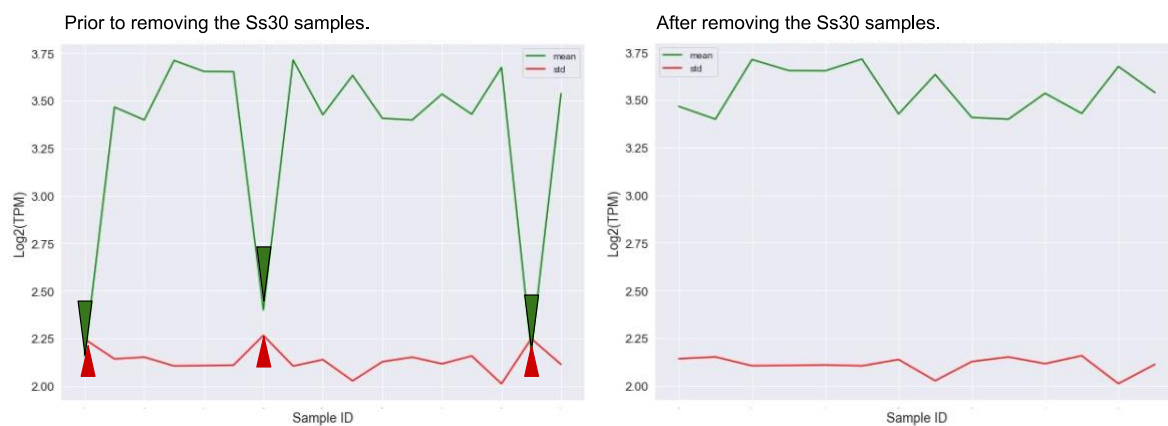

**Figure S2. Distributions of atypical samples in stress-treated gene networks.** (A) Distribution of stress-treated samples without including the Ss30s samples, (B) Distribution of the atypical samples, (C) Mean (green line) and the standard deviation (red line) before and after removing the Ss30, Ss30.1 and Ss30.2 samples from the stress-treated dataset.

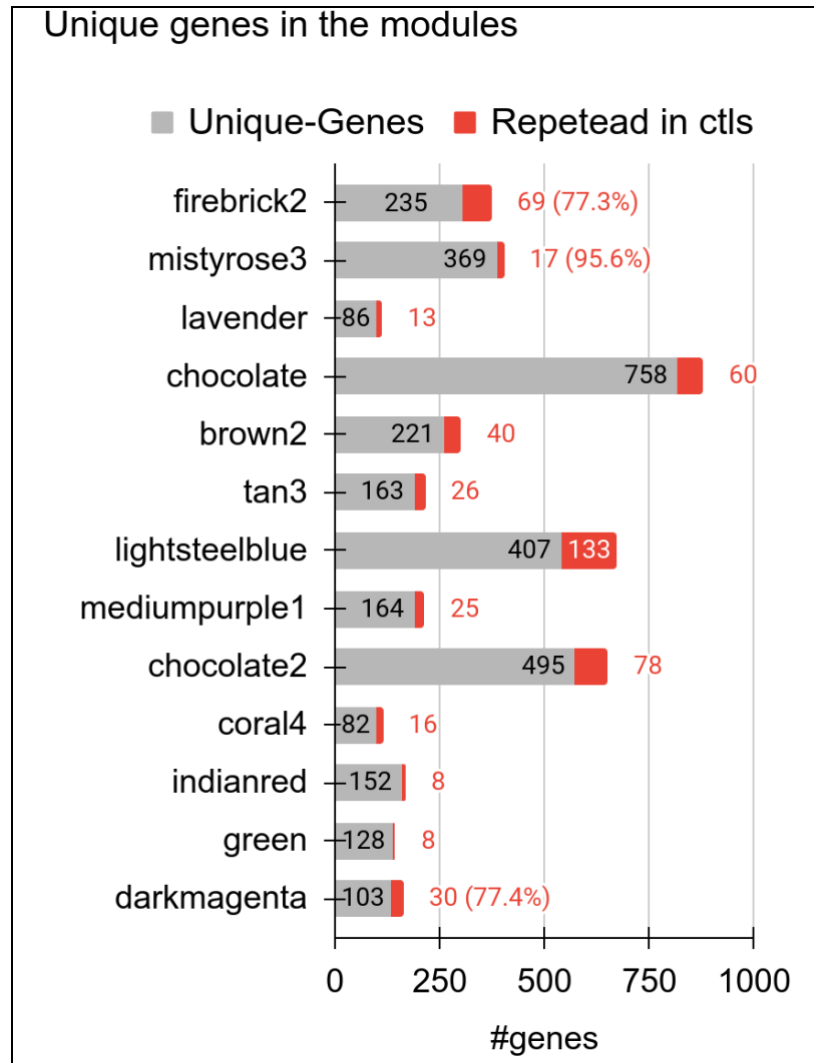

**Figure S3. Unique genes identified in infected-plants gene modules.** The gray bars show the number of genes that were unique in each gene module. The red bar show the number of repeated genes found in the healthy-control network when comparing both gene co-expression networks.

**Table S1.** Sample information obtained from NCBI SRA.

| Sample                                     | Treatment                          | HPI | Sample ID | BioProject                 | Reference                                                     |
|--------------------------------------------|------------------------------------|-----|-----------|----------------------------|---------------------------------------------------------------|
| <i>Arabidopsis thaliana</i> (Col-0) leaves | <i>Colletotrichum higginsianum</i> | 22  | Ch22      | PRJNA148307                | [1,2]                                                         |
|                                            |                                    | 40  | Ch40      |                            |                                                               |
|                                            | <i>Sclerotinia sclerotiorum</i>    | 30  | Ss30      | PRJNA418121                | [3]                                                           |
|                                            | <i>Botrytis cinerea</i>            | 12  | Bc12      | PRJNA315516<br>PRJNA593073 | Utrecht University (2016)<br>Beijing normal University (2019) |
|                                            |                                    | 18  | Bc18      |                            |                                                               |
|                                            |                                    | 24  | Bc24      |                            |                                                               |
|                                            | Control                            | 12  | Healthy12 | PRJNA315516<br>PRJNA418121 | [1]                                                           |
|                                            |                                    | 18  | Healthy18 |                            |                                                               |
|                                            |                                    | 24  | Healthy24 |                            |                                                               |
|                                            |                                    | 30  | Healthy30 |                            |                                                               |

HPI: hours post-inoculation

**Table S2.** Databases, bioinformatic tools and source code.

| Databases to extract RNA-Seq data and complementary data                                                                                                                                                            |                                                                                                                                                                                                                                                                          |                                                                                   |
|---------------------------------------------------------------------------------------------------------------------------------------------------------------------------------------------------------------------|--------------------------------------------------------------------------------------------------------------------------------------------------------------------------------------------------------------------------------------------------------------------------|-----------------------------------------------------------------------------------|
| DB OR FILE NAME                                                                                                                                                                                                     | DESCRIPTION                                                                                                                                                                                                                                                              | WEBSITE                                                                           |
| SRA-NCBI DB                                                                                                                                                                                                         | Bulk RNASeq data                                                                                                                                                                                                                                                         | https://www.ncbi.nlm.nih.gov/sra                                                  |
| TAIR10 Genome Fasta File                                                                                                                                                                                            | TAIR10 genome release 2010                                                                                                                                                                                                                                               | https://www.arabidopsis.org/download/index-auto.jsp?dir=/download_files/Sequences |
| Araport11 Genome Annotation                                                                                                                                                                                         | Genome Annotation Release 2016                                                                                                                                                                                                                                           | https://www.arabidopsis.org/download/index-auto.jsp?dir=/download_files/Sequences |
| Bioinformatic tools to estimate the RNA-Seq raw-counts                                                                                                                                                              |                                                                                                                                                                                                                                                                          |                                                                                   |
| TOOL NAME                                                                                                                                                                                                           | DESCRIPTION                                                                                                                                                                                                                                                              | WEBSITE                                                                           |
| SRA-Toolkit                                                                                                                                                                                                         | To download SRA accessions                                                                                                                                                                                                                                               | Toolkithttps://hpc.nih.gov/apps/sratoolkit.html                                   |
| FastQC                                                                                                                                                                                                              | To perform quality analysis                                                                                                                                                                                                                                              | https://www.bioinformatics.babraham.ac.uk                                         |
| Trimmomatic                                                                                                                                                                                                         | To preprocessing fq files                                                                                                                                                                                                                                                | http://www.usadellab.org/cms/?page=trimmomat                                      |
| STAR                                                                                                                                                                                                                | To perform read alignments                                                                                                                                                                                                                                               | https://github.com/alexdobin/STAR                                                 |
| HT-Seq-qa<br>HT-Seq-count                                                                                                                                                                                           | To test SAM files quality<br>To estimate raw-counts                                                                                                                                                                                                                      | https://htseq.readthedocs.io/en/master/                                           |
| 4-Step methodology for RNA-Seq integration. Python (v3.8.10)<br><a href="https://github.com/cyntsc/RNA-Seq-raw-integration">https://github.com/cyntsc/RNA-Seq-raw-integration</a> . DOI 10.5281/zenodo.7076416      |                                                                                                                                                                                                                                                                          |                                                                                   |
| STEP 1: Raw-count integration                                                                                                                                                                                       | 1_Step1_integrating_raw_counts (integrate and clean datasets)<br>Venn_diagram_genes_in_ceros.ipynb (compare TT vs CL repressed genes)                                                                                                                                    |                                                                                   |
| STEP 2: TPM normalization                                                                                                                                                                                           | 2_Step2_TPM_normalization.ipynb (normalize datasets)<br>*(prepare a gene length file)                                                                                                                                                                                    |                                                                                   |
| STEP 3: Data standardization                                                                                                                                                                                        | 3_Step3_TPM_standardization.ipynb (cut off extreme and underrepresented values)                                                                                                                                                                                          |                                                                                   |
| STEP 4: Data log transformation and atypical identification                                                                                                                                                         | 4_Step4_Log2_scale.ipynb (reduce scale representation and identify source of noise)                                                                                                                                                                                      |                                                                                   |
| Script to extract gene lengths for step 2.                                                                                                                                                                          | Gene_length_extraction_from_GTF.ipynb (extract gene lengths for normalization)                                                                                                                                                                                           |                                                                                   |
| Script to extract gene modules for annotation tasks                                                                                                                                                                 | 6_modules_percentual_differentiation.ipynb                                                                                                                                                                                                                               |                                                                                   |
| Network implementation and gene module identification. R (v4.1.0)<br><a href="https://github.com/cyntsc/RNA-Seq-raw-integration">https://github.com/cyntsc/RNA-Seq-raw-integration</a> . DOI 10.5281/zenodo.7076416 |                                                                                                                                                                                                                                                                          |                                                                                   |
| 01_Healthy_SignedNtw_D.R<br>01_Infected_SignedNtw_E.R<br>02_Healthy_GS_MM_24hpi.R<br>02_Infected_GS_MM_24hpi.R                                                                                                      | Network implementation for a signed-ntw for the healthy plants<br>Network implementation for a signed-ntw for the infected plants<br>Gene-Significance and Module-Membership for the healthy network<br>Gene-Significance and Module-Membership for the infected network |                                                                                   |
| Gene Ontology annotation                                                                                                                                                                                            |                                                                                                                                                                                                                                                                          |                                                                                   |
| Panther v17.0 (Released 20221013)                                                                                                                                                                                   | http://pantherdb.org/webservices/go/overrep.jsp                                                                                                                                                                                                                          |                                                                                   |

**Table S3.** Significant gene modules identified in the healthy-control and fungal-infected samples.

| Condition                     | Module Name     | Cluster Size | R <sup>2</sup> |
|-------------------------------|-----------------|--------------|----------------|
| Control samples gene networks | coral3 *        | 2024         | +0.98          |
|                               | blue3 *         | 79           | +0.96          |
|                               | navajowhite3 *  | 492          | +0.79          |
|                               | magenta2        | 204          | -0.98          |
|                               | darkolivegreen4 | 1792         | -0.97          |
|                               | antiquewhite    | 764          | -0.88          |
| Stress-treated gene networks  | chocolate *     | 818          | +0.98          |
|                               | dodgerblue1 *   | 72           | +0.96          |
|                               | green3 *        | 472          | +0.95          |
|                               | chocolate2 *    | 573          | +0.91          |
|                               | tomato2         | 218          | -0.94          |
|                               | palevioletred1  | 368          | -0.93          |
|                               | green           | 236          | -0.90          |
|                               | deepskyblue     | 39           | -0.80          |

\* Gene modules with positive R<sup>2</sup> were selected to perform the Gene Ontology overrepresentation gene test.

**Table S4.** Gene Ontology overrepresentation test summary.

|                               | Module name  | #Genes | GO Category | Mapped genes | Classified | Unclassified |
|-------------------------------|--------------|--------|-------------|--------------|------------|--------------|
| Control samples gene networks | Coral3       | 2024   | MF          | 1991         | 726        | 1265         |
|                               | navajowhite3 | 492    | BP          | 489          | 168        | 321          |
|                               | Blue3        | 79     | BP          | 79           | 76         | 3            |
| Stress-treated gene networks  | Chocolate    | 818    | MF          | 805          | 247        | 558          |
|                               | Chocolate2   | 573    | MF          | 566          | 180        | 386          |
|                               | Green3       | 472    | MF          | 456          | 118        | 338          |
|                               | Dodgerblue1  | 72     | None        | 70           | NA         | NA           |

MF: Molecular function, BP: Biological Process

**Table S5.** Genes functional groups related to multiple fungal infections identified by DAVID

| Group Description                | Number of genes<br>(including duplicates) | EASE Score*<br>(>0.8) |
|----------------------------------|-------------------------------------------|-----------------------|
| Cell wall / extracellular region | 28                                        | 0.42835               |
| Developmental protein            | 23                                        | 0.59716               |
| Glycosyltransferase              | 34                                        | <b>1.34897</b>        |
| Methyltransferase                | 13                                        | <b>0.87954</b>        |
| Microtubule binding              | 11                                        | 0.77645               |
| Protein kinase activity          | 85                                        | 0.44928               |
| Protein transport                | 23                                        | <b>1.11126</b>        |
| Regulation of transcription      | 75                                        | 0.31824               |
| Sterol metabolism                | 22                                        | <b>1.35113</b>        |
| WD40 repeat / G-protein          | 28                                        | <b>1.55271</b>        |
| Zinc finger                      | 17                                        | <b>1.01733</b>        |
| mRNA binding                     | 14                                        | 0.62084               |
| LRR Receptors                    | 15                                        | 0.52845               |

\*Scores highlighted in bold show the groups selected in this study.

## References

1. O'Connell, R.J.; Thon, M.R.; Hacquard, S.; Amyotte, S.G.; Kleemann, J.; Torres, M.F.; Damm, U.; Buiate, E.A.; Epstein, L.; Alkan, N.; et al. Lifestyle Transitions in Plant Pathogenic *Colletotrichum* Fungi Deciphered by Genome and Transcriptome Analyses. *Nat Genet* **2012**, *44*, 1060–1065, doi:10.1038/ng.2372.
2. Robin, G.P.; Kleemann, J.; Neumann, U.; Cabre, L.; Dallery, J.-F.; Lapalu, N.; O'Connell, R.J. Subcellular Localization Screening of *Colletotrichum Higginsianum* Effector Candidates Identifies Fungal Proteins Targeted to Plant Peroxisomes, Golgi Bodies, and Microtubules. *Front. Plant Sci.* **2018**, *9*, 562, doi:10.3389/fpls.2018.00562.
3. Badet, T.; Voisin, D.; Mbengue, M.; Barascud, M.; Sucher, J.; Sadon, P.; Balagué, C.; Roby, D.; Raffaele, S. Parallel Evolution of the POQR Prolyl Oligo Peptidase Gene Conferring Plant Quantitative Disease Resistance. *PLOS Genetics* **2017**, *13*, e1007143, doi:10.1371/journal.pgen.1007143.
